# Supplementary material for: iBCE-EL: A New Ensemble Learning Framework for Improved Linear B-Cell Epitope Prediction
Source: Front Immunol. 2018 Jul 27;9:1695. doi: 10.3389/fimmu.2018.01695 (PMC6072840; doi:10.3389/fimmu.2018.01695)
Supplement: Supplementary file 4 [file table_1.docx]

**Table S1.** Hyperparameters optimised by grid search

| **Method** | **Parameter** | **Tested values** |
| --- | --- | --- |
| RF, ERT, and GB | Number of estimators (n_estimators[a]) | 60–1000 with an interval of 20 |
| Maximum number of features considered per split (max_features[a]) | 1–20 with an interval of 1, “sqrt[b]”, None[c] |
| Minimum number of samples required to split an internal node (min_samples_split[a]) | 2–10 with an interval of 1 |
| SVM | Penalty parameter (C[a]) | [2-15–210] in log2 steps |
| Kernel coefficient ([a]) | [2-10–210] in log2 steps |
| AB | Maximum number of estimators at which boosting is terminated (n_estimator[a]) | 20-1000 with an interval of 20. |
| *k*-NN | Number of neighbors (n_neighbors[a]) | 1-150 with an interval of 1. |

Column 1 represents the ML algorithms. Column 2 and 3 respectively represent the parameter and the tested values. [a] Parameter name in the scikit-learn implementation. [b] default value. [c] all features are used.
